# Supplementary material for: Myelination of Purkinje axons is critical for resilient synaptic transmission in the deep cerebellar nucleus
Source: PubMed Central journal article supplement (PMC5773691; doi:10.1038/s41598-018-19314-0), 2018-01-18
Supplement: 41598_2018_19314_MOESM1_ESM.pdf [file 41598_2018_19314_MOESM1_ESM.pdf]

## **Supplementary Figure**

# **Myelination of Purkinje axons is critical for resilient synaptic transmission in the deep cerebellar nucleus**

Tara Barron, Julia Saifetiarova, Manzoor A. Bhat and Jun Hee Kim\*

Department of Cellular and Integrative Physiology, University of Texas Health Science Center,  
San Antonio, Texas 78229, USA

Running title: Myelination regulates synaptic transmission

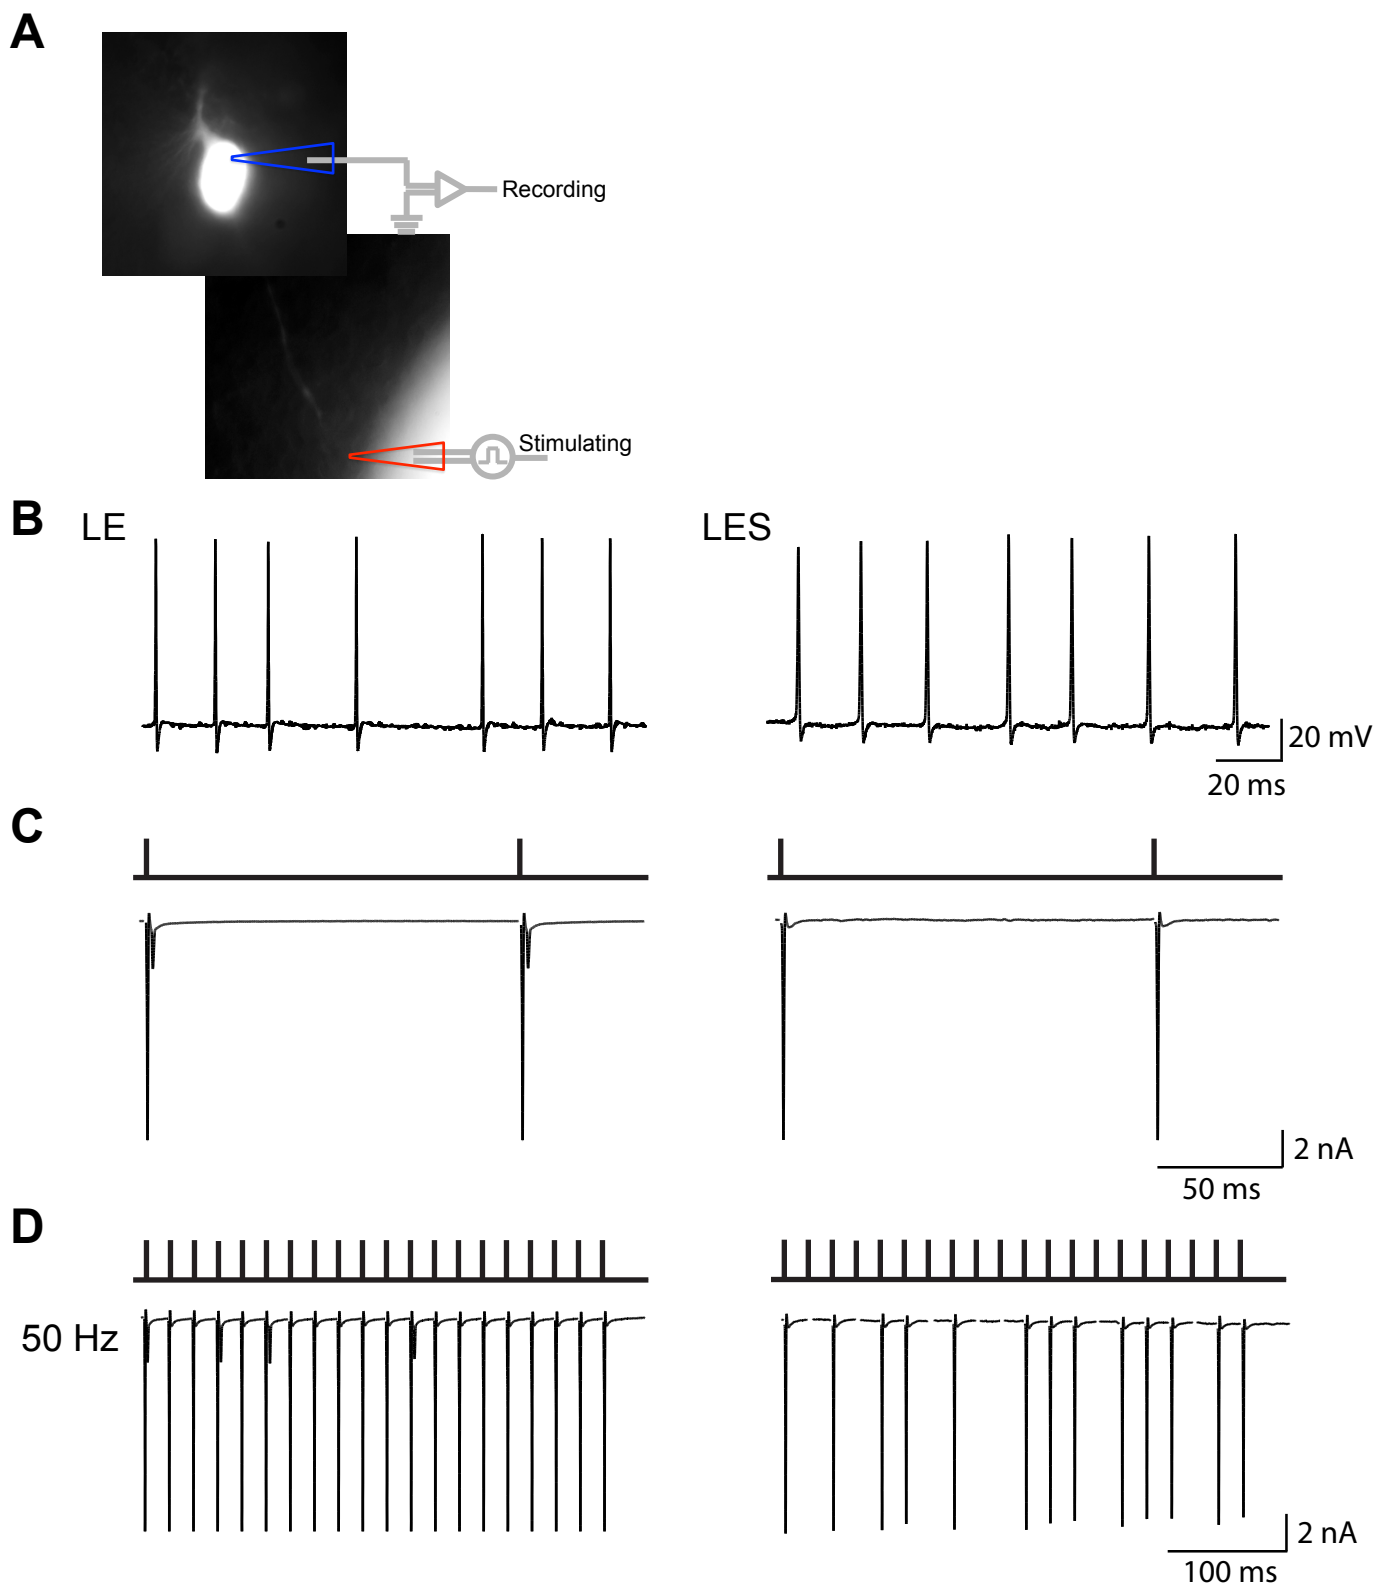

**Supplementary Figure 1. AP firing and propagation in *LE* and *LES* Purkinje cells.**  
**A.** Purkinje cells were patched at the soma and filled with fluorescent dye to visualize the axon so that a stimulating electrode could be placed on the axon. **B.** Representative traces of spontaneous AP firing in *LE* and *LES*. **C.** Backpropagation action currents in Purkinje somata resulted when the axon was stimulated with a bipolar stimulating electrode in the presence of CNQX. **D.** Failure of backpropagation currents occurred in *LES* Purkinje cells when stimulated at 50 Hz, but did not occur in *LE* cells.
